# Supplementary material
Source: publisher figshare collection journal article supplement (https://tandf.figshare.com/articles/dataset/_/23586796)
Supplement: Supplementary file 1 [file 1]

## Sheet: Sheet1
Tumor Type	Participants, No.
Non-CNS Tumors
Neuroblastoma	20
Rhabdomyosarcoma	14
Lymphoma	11
Ewing sarcoma	9
Wilms tumor	9
Histiocytosis	9
Papillary thyroid carcinoma	8
Hepatoblastoma	8
Osteosarcoma	6
Neoplasm, NOS	5
Germ cell tumor	4
Rhabdoid tumor	3
Synovial sarcoma	3
Colorectal adenocarcinoma	3
Carcinoma, NOS	2
Fibromatosis	2
Paraganglioma	2
Desmoplastic small round cell tumor	2
Pleuropulmonary blastoma	1
Sacrococcygeal tumor	1
Ovarian borderline mucinous tumor	1
Primitive round blue cell neural tumor	1
Sarcoma, NOS	1
Myofibroblastic tumor	1
Renal cell carcinoma	1
Sertoli-Leydig cell tumor	1
Nasopharyngeal carcinoma	1
Undifferentiated embryonal sarcoma of the liver	1
Leiomyosarcoma	1
Follicular adenocarcinoma, NOS	1
Neuroendocrine carcinoma, NOS	1
Small cell sarcoma of the kidney	1
Carcinoid tumor	1
Medullary carcinoma with amyloid stroma	1
Total	136
CNS tumors
Pilocytic astrocytoma	14
Glioblastoma	9
Medulloblastoma	8
Anaplastic ependymoma	6
Diffuse intrinsic pontine glioma	6
Germinoma/Germ cell tumor	6
Retinoblastoma	5
Atypical teratoid rhabdoid tumor	4
Pilomyxoid astrocytoma	2
Diffuse astrocytoma	2
Subependymal giant cell astrocytoma	2
Primitive neuroectodermal tumor	2
Chordoma	2
Medulloepithelioma	2
Dysembryoblastic neuroepithelial tumor	2
High grade glioma, NOS	1
Pleiomorphic xanthoastrocytoma	1
Meningioma	1
Choroid plexus carcinoma	1
Choroid plexus papilloma	1
Myxopapillary ependymoma	1
Anaplastic astrocytoma	1
CNS embryonal tumor, NOS	1
Glioneuronal tumor	1
Total	81
Abbreviation: CNS, central nervous system; NOS, not otherwise specified
