# Supplementary material
Source: publisher figshare collection journal article supplement (https://tandf.figshare.com/articles/dataset/_/23586796)

## Longitudinal Plasma Sample Collection

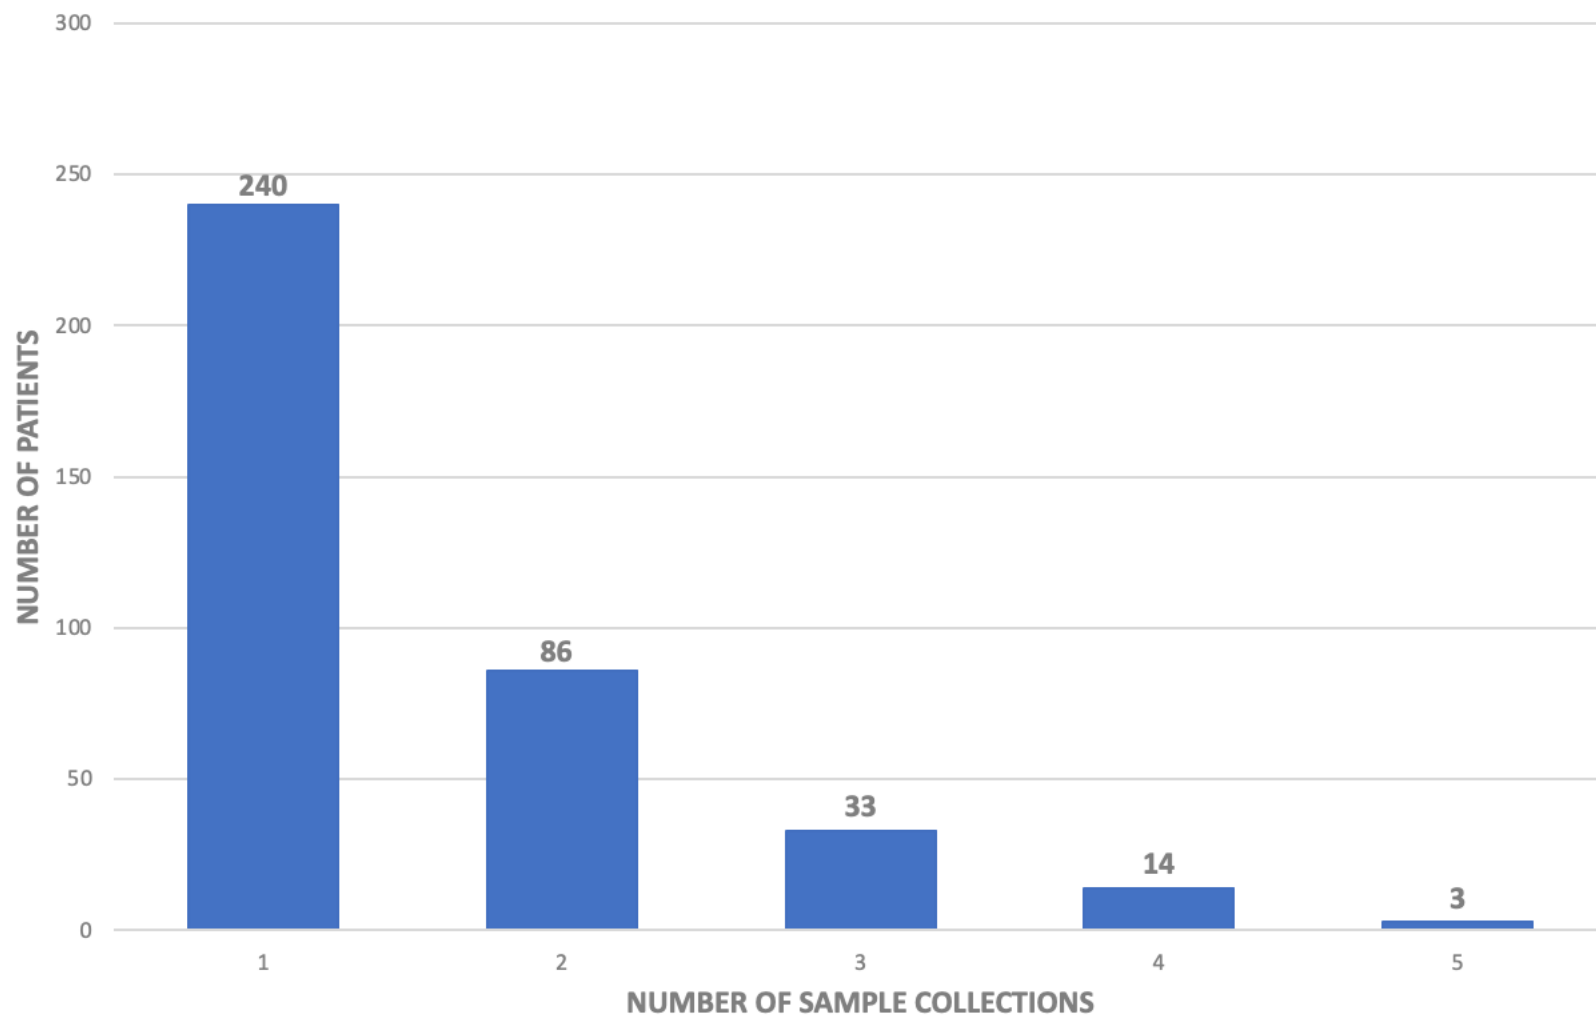

Supplement: Supplementary file 1 [file 1]

## Non-CNS Solid Tumors

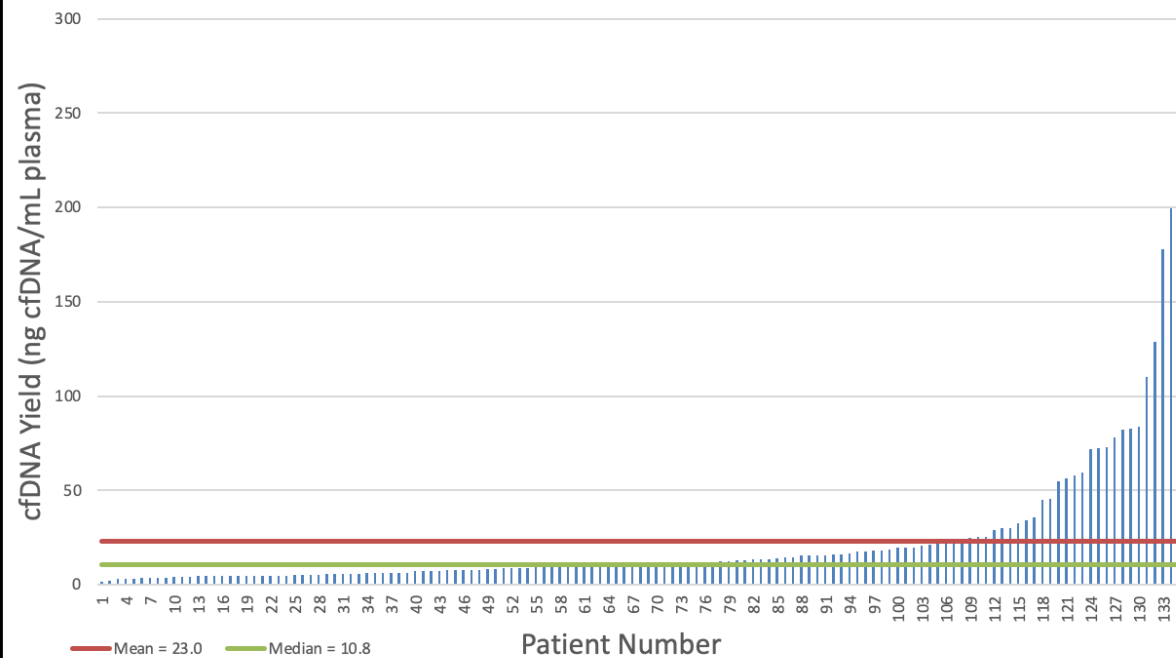

## CNS Tumors

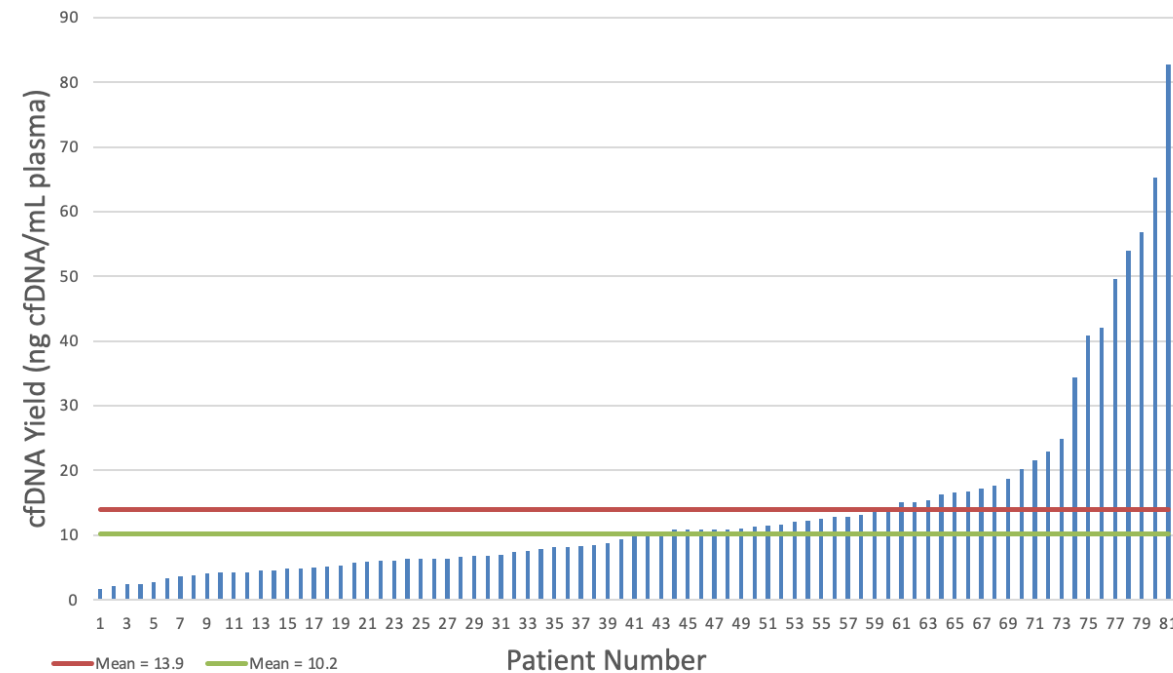

Supplement: Supplementary file 2 [file 1]
